# Supplementary material
Source: PubMed Central journal article supplement (PMC3256913)
Supplement: supp_M111.316372_revised_supplemental_data.pdf [file supp_M111.316372_revised_supplemental_data.pdf]

## Supplemental Data

### Supplemental Figure Legends

**Supplemental Figure 1.** Testis histological phenotype of WT and *gilz* KO testes. (A) High-power (40x) images of testis histological section from WT and *gilz* KO mice at various age as indicated in the figure assessed by H&E staining. At 7dpp *gilz* KO tubules contain more cells compared to controls. Abnormal germ cell (arrowheads) were detectable in 10dpp *gilz* KO mice. At 14dpp and 21dpp, germ cells had almost disappeared in tubules of *gilz* KO mice and many abnormal spermatocytes and apoptotic cells are shown (asterisks). *Gilz* KO tubules contain only Sertoli cells (black arrows). Scale bars 50  $\mu\text{m}$ . (B) Quantification of germ cells per seminiferous tubule. The numbers of germ cells in 25 seminiferous tubules per testis were counted in five mice of each genotype. The numbers of germ cells per tubule were statistically significant between WT and *gilz* KO mice at 7dpp and 14dpp. \*  $P < 0,05$ , two-tailed Student's t-test. (C) Loss of the germ cell-specific markers in mutant testes as assessed by qPCR; results are shown as means  $\pm$  SEM; N=5 mice per group. \*  $P < 0,05$ , two-tailed Student's t-test. (D) IHC analysis of  $\gamma\text{H2AX}$  expression in sections from WT and *gilz* KO 7dpp and 10dpp testes. Scale bars, 200  $\mu\text{m}$ .

**Supplemental Figure 2.** Massive apoptosis in *gilz* KO spermatocytes. (A, B) Germ cell apoptosis in different stages of spermatogenesis, as reported in the figure, was evaluated by TUNEL assay. Apoptotic cells were stained in red (A). In the graphic chart (B) are reported the total number of TUNEL+ cells per image. Scale bars, 200  $\mu\text{m}$ . (C, D) Expression of apoptosis-related genes did not differ in WT and *gilz* KO mice before meiosis entry (10dpp). Heat map (C) and scatter plot (D) images represent results of array analysis assessed by gene expression profiling using qPCR. Heat map shows differential expression patterns between 10 dpp WT and *gilz* KO testes (up-regulated genes are shown in red, and down-regulated genes in green); scatter plot indicate deviation of *gilz* KO data from WT trendline. There are no significant differences between WT and *gilz* KO apoptotic gene expression, the only gene strongly downregulated, represented in position D11 (green) in the heat map and indicated by in the scatter plot (arrow), was *Tsc22d3* (alias *gilz*).

**Supplemental Figure 3.** FSH, LH and Testosterone hormonal levels are comparable in WT and *gilz* KO testes. (A) Analysis of mRNA expression of FSH and LH in the pituitary gland from adult WT and *gilz* KO mice, as assessed by RTPCR. (B) Analysis of mRNA expression of AR, GR, ER, LHR, FSHR in the testes from adult WT and *gilz* KO mice, as assessed by RTPCR. HPRT (25 cycles) served as a normalization control. (C) Serum testosterone concentrations in 6 months old WT and *gilz* KO mice. Values are reported as means  $\pm$  s.e.m.; n=3 mice per group. \*  $P < 0,05$ , two-tailed Student's t-test. No significant difference was found between WT and *gilz* KO mice.

**Supplemental Figure 4. Specific *gilz* KO in germ cell lineage (cKO) is sufficient to disrupt spermatogenesis.** Histological analysis (A) showed that testes from 3 months old *gilz* cKO mice contain only Sertoli cells (arrowhead). Scale bars, 50  $\mu\text{m}$ . (B) Loss of the germ cell-specific markers in *gilz* cKO testes assessed by qPCR. Results are shown as means  $\pm$  s.e.m.; n=4 mice per group. \*  $P < 0,05$ , two-tailed

Student's t-test. (C, D) Sections of *gilz* KO recipient testis after transplantation with wt germ cells were stained with hematoxylin and eosin. Repopulation of seminiferous tubuli in *gilz* KO recipient testis. Scale bars, 100  $\mu$ m (C); 50  $\mu$ m (D). (E) Donor germ cells were positive for L-GILZ protein as evaluated by IHC analysis. (F) Percentages of repopulated tubules in *gilz* KO transplanted testis. n=5 mice per group. The mean of each data set is plotted with a horizontal bar. At least 100 tubules were counted for each testis.

## Supplemental Text

### Supplemental Materials and Methods

**Generation of specific germ cells *gilz* KO mice.** To generate specific germ cells *gilz* KO mice (*gilz*-cKO), male *gilz* flox/Y mice were crossed with transgenic mice in which Cre-recombinase is expressed under the control of the Mvh promoter (53), which become active specifically in germ cells starting from embryonal male primordial germ cells development.

**TUNEL assay.** Apoptotic cells were detected with ApopTag Red In Situ Apoptosis Detection Kit (Millipore), following manufacturer's instructions. The samples were observed by fluorescence microscopy, using a Leica microscope equipped with Diagnostic Instruments RT Color camera. TUNEL-positive cells were counted on every section and plotted in the graphic chart.

**Apoptosis PCR Array analysis.** For Apoptosis Signalling Pathway PCR Array analysis RNAs from 10dpp wt and *gilz* KO mice (n=3) were pooled and treated with DNase (Turbo DNA-Free; Ambion). A total of 1  $\mu$ g of pooled RNA was retrotranscribed by reverse transcription-PCR (RT-PCR) kit (SABiosciences Corp.). The quality of cDNAs was tested by using RT2 RNA QC-Array (SABiosciences). Mouse Apoptosis RT2 Profiler PCR Array was purchased from SABioscience. PCR was performed according to the manufacturer's instructions on an ABI 7300 Real Time (Applied Biosystems). The data were imported into an Excel database and submitted to SABiosciences PCR Array Data Analysis Web Portal that automatically perform calculation and interpretation of the raw data. This data were analyzed using the comparative cycle threshold method with normalization to 4 housekeeping genes. The results are presented as n-fold changes versus the values in wt control mice.

**Radioimmunoassay (RIA).** Mice were anesthetized with isoflurane and immediately dissected to access the heart. Blood was collected and spun down at 10,000 g for 10min at 4°C to isolate the serum. Serum testosterone concentrations from individual mice were measured by radioimmunoassay after ether extraction as previously described (54).

**Germ Cell Transplantation.** Donor cells were isolated from testis of C57BL/6 WT mice as previously described (34). Purified germ cells were transplanted into recipient 3 months old *gilz* KO male mice at a concentration of 10<sup>6</sup> cells/ml. Three months after transplantation, the number of donor colonies was quantified for each recipient testis by microscopy analysis. To quantify the percentage of tubules repopulated by the donor, we analyzed at least 200 tubules throughout each testis.

### Supplemental References

53. Gallardo, T., Shirley, L., John, G. B., and Castrillon, D. H. (2007) *Genesis* **45**, 413-417
54. Resko, J. A. (1969) *Science* **164**, 70-71

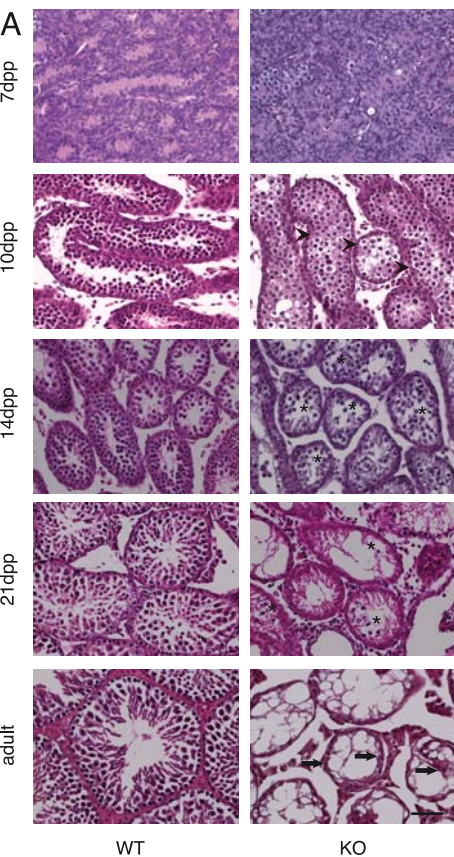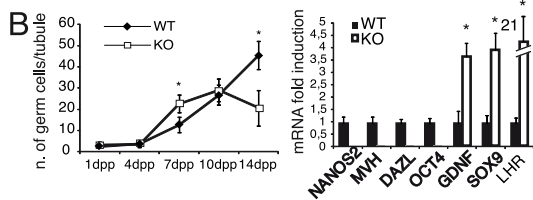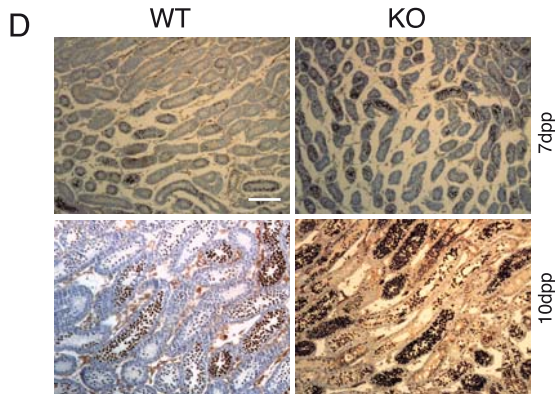

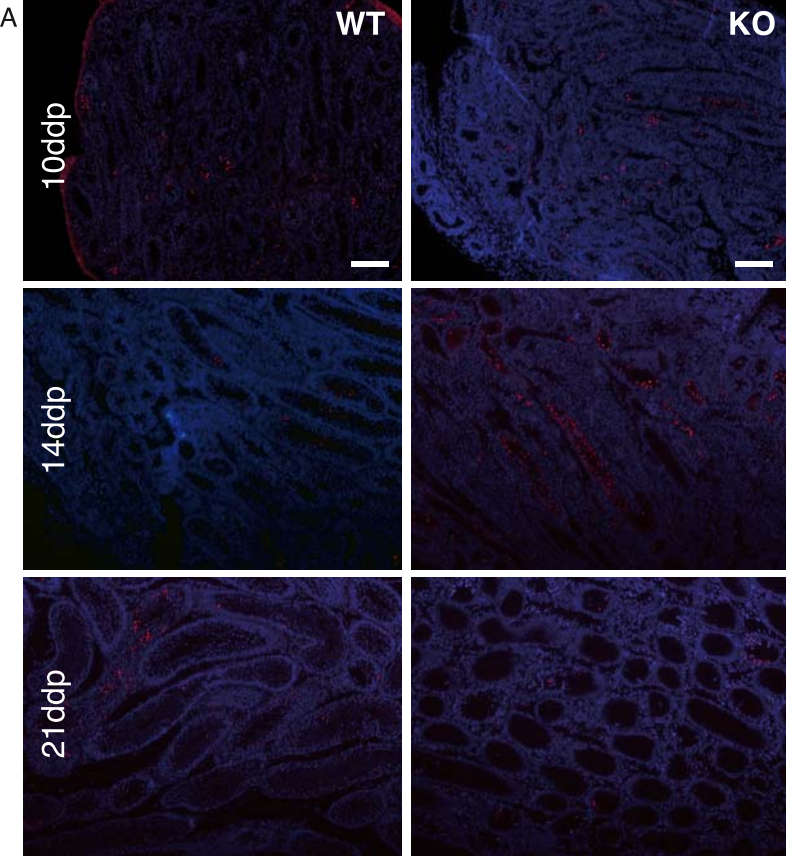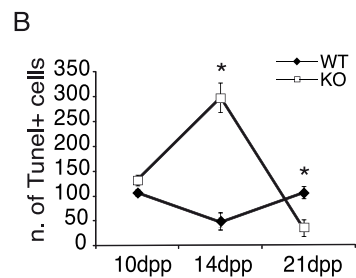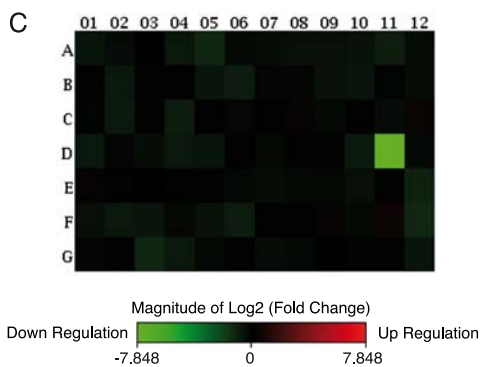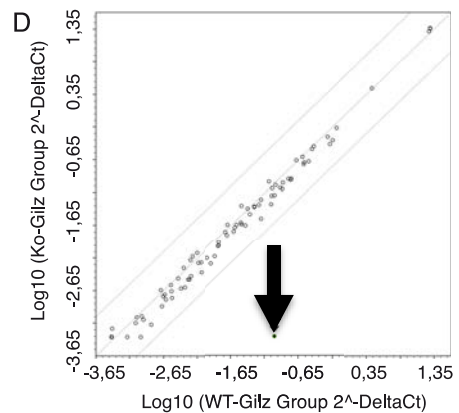

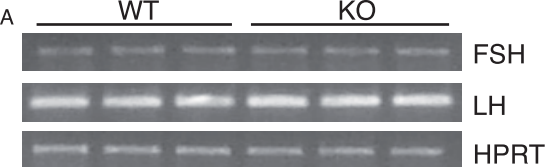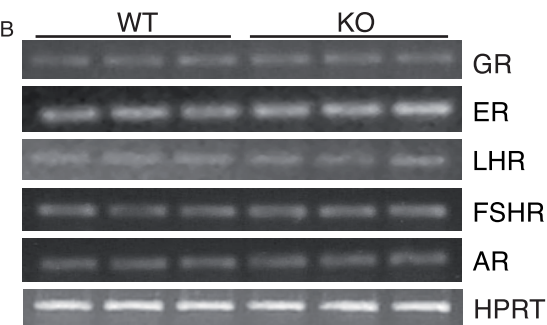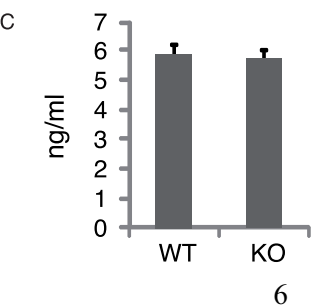

Supplemental Figure 3

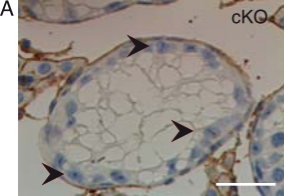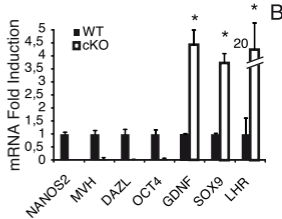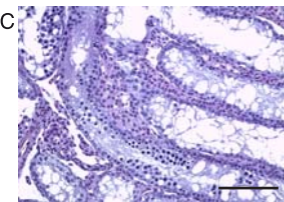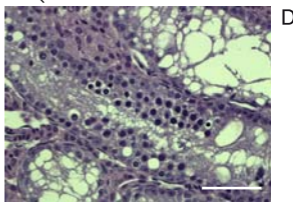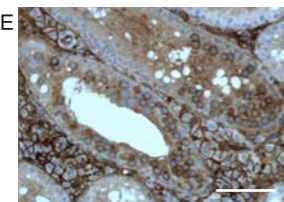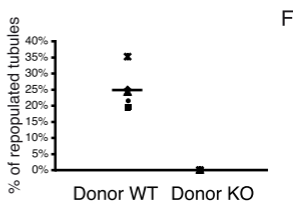

Supplementary table 1: Array gene list

| Probeset ID | Gene Symbol        | RefSeq             | Fold-Change(KO vs. WT) |
|-------------|--------------------|--------------------|------------------------|
| 10606989    | Tsc22d3            | NM_001077364       | -2,37505               |
| 10576049    | Foxf1a             | ENSMUST00000098351 | -1,74256               |
| 10576046    | Foxf1a             | NM_010426          | -1,61412               |
| 10576051    | Foxc2              | NM_013519          | -1,59418               |
| 10547227    | Ret                | NM_001080780       | -1,59082               |
| 10428388    | Rspo2              | NM_172815          | -1,5699                |
| 10466886    |                    | ---                | -1,51568               |
| 10468722    | Gfra1              | NM_010279          | -1,48612               |
| 10598251    | Dgkk               | NM_177914          | -1,461                 |
| 10550181    |                    | ---                | -1,38541               |
| 10508907    |                    | ---                | -1,38478               |
| 10467979    | Scd1               | NM_009127          | -1,36834               |
| 10364542    | Cfd                | NM_013459          | -1,34956               |
| 10416725    | Tdrd3              | ENSMUST00000022596 | -1,33408               |
| 10399581    | 3110053B16Rik      | AK148766           | -1,30283               |
| 10563706    | EG668725           | DQ386867           | -1,29228               |
| 10489909    | Ube2v1             | NM_023230          | -1,13801               |
| 10372730    | Itifb              | NM_054079          | 1,04814                |
| 10573054    | Gypa               | NM_010369          | 1,19587                |
| 10545026    | V1rc24             | NM_134179          | 1,25169                |
| 10403816    |                    | ---                | 1,25261                |
| 10418986    |                    | ---                | 1,27584                |
| 10602372    | Alas2              | NM_009653          | 1,29731                |
| 10484600    | Olfr1062           | NM_147078          | 1,33056                |
| 10608226    |                    |                    | 1,35665                |
| 10608492    | 1700040F15Rik      | AK076905           | 1,3567                 |
| 10399710    | Rsad2              | NM_021384          | 1,3905                 |
| 10608523    | LOC380994          | BC099537           | 1,3969                 |
| 10578136    |                    | ---                | 1,42112                |
| 10467840    | C130021O09Rik      | AK081501           | 1,42563                |
| 10608184    | Zfy2               | NM_009571          | 1,42646                |
| 10488465    | Zfp345             | NM_001034900       | 1,4795                 |
| 10599917    | Fmr1nb             | NM_174993          | 1,49604                |
| 10605633    | Pet2               | NM_008821          | 1,58541                |
| 10603926    | EG382275           | NM_001025607       | 1,6217                 |
| 10603936    | EG382275           | NM_001025607       | 1,6287                 |
| 10603914    | EG546272           | NM_001100444       | 1,63487                |
| 10603953    | 382277             | NM_001040669       | 1,70127                |
| 10566205    | Dub2a              | NM_001001559       | 1,71279                |
| 10607454    | Magea1             | NM_020015          | 1,71553                |
| 10599064    | OTTMUSG00000018086 | NM_001110250       | 1,78919                |
| 10603986    | OTTMUSG00000018086 | NM_001110250       | 1,79064                |
| 10604023    | OTTMUSG00000018086 | NM_001110250       | 1,79064                |
| 10599096    | ENSMUSG00000059047 | NM_001109969       | 1,81248                |
| 10603975    | OTTMUSG00000018086 | NM_001110250       | 1,81248                |
| 10599075    | OTTMUSG00000018086 | NM_001110250       | 1,81257                |
| 10599107    | OTTMUSG00000018086 | NM_001110250       | 1,81257                |
| 10603964    | OTTMUSG00000018086 | NM_001110250       | 1,81257                |
| 10603997    | OTTMUSG00000018086 | NM_001110250       | 1,81257                |
| 10604008    | OTTMUSG00000018086 | NM_001110250       | 1,81257                |
| 10599673    | 4930527E24Rik      | ENSMUST00000088740 | 1,90453                |
| 10603911    |                    | ---                | 1,94255                |



Supplementary table 2: PCR primers list

| Gene Symbol | Forward (5'-3')         | Reverse (5'-3')           |
|-------------|-------------------------|---------------------------|
| AR          | AAGACCTGCCTGATCTGTGG    | TCGTTTCTGCTGGCACATAG      |
| Bcl6        | GCAGCAGTGAAGAAGGAACC    | AGCCACAGCCTCACAGTTCT      |
| Beta Actin  | CCAACCGTGAAAAGATGACC    | CGTGAGGGAGAGCATAGCC       |
| cRET        | TCTTCTGTGTCTGCCACCAC    | GCCTTCTCCCAGAGTTTTCC      |
| Cyclin A1   | CAGAGCTCCAAGAGTGGAG     | AGTGGAGA TCTGACTTGAGC     |
| Cyclin A2   | CACCTCGAGGCATTCGGG      | CGGGTAAAGAGACAGCTGC       |
| DAZL        | TTCAGGCATATCCTCCTTATC   | ATGCTTCGGTCCACAGACTTC     |
| ER          | GATGGGCTTATTGACCAACC    | CCAGGCACA CTCCAGAAAGG     |
| FSH         | TCAGCTTTCCCCAGAAAGAGA   | CCGAGCTGGGTCTTATACA       |
| FSHR        | CAAAGCTTCGAGTCA TTCCA   | ATGCAAGTTGGGTAGGTTGG      |
| GDNF        | CGGACGGGACTCTAAGATGA    | CGTCATCAA ACTGGTCA GGA    |
| GFRA1       | CCATGTTCTTAGCCACTCTG    | CACTGGCTTTCACACAGTCC      |
| GR          | AACTGGAATAGGTCCAAGG     | GAGCACACCAGGCAGAGTTT      |
| HPRT        | CGTCGTGATTA GCGATGATG   | ACAGAGGGCCACAATGTGAT      |
| LH          | AGTTCTGCCAGTCTGCA TC    | TGAGGGCTACAGGAAAGGAG      |
| LHR         | TCACAAGCTTTCAGGGGACT    | GCAGGTTTTTGGTGTCTGG       |
| LHX1        | CCCAGCTTTCCCGAATCCT     | GCGGGACGTA AATAAATAAAATGG |
| MAGEA1      | GCCCAAGACA GGTA TCCTCA  | TGATTTTCAGGCCACCCTTCC     |
| MAGEA2      | CCCTGGTA TCAAGGAGCTGA   | CTAATTCCTGTTGGGCCTGA      |
| MAGEA3      | ACCTGGAA TACAGGCAGGTG   | AGGTCAGAGGAGTTGGAGCA      |
| MAGEA5      | GCTGAAA CCCTGGTAAAGCA   | TGGAAA TCAGCCA TTGTGAC    |
| MAGEA6      | GCTGAAA CCCTGGTAAAGCA   | TGGAAA TCAGCCA TTGTGAC    |
| MVH         | GATGAAGATTGGGAGGCAGA    | GTTTCCAAA GCCCTTCTC       |
| NANOS2      | CCTGGATGTCTGCCTACCAT    | GCTGACTGCTGTTGAGTGGA      |
| NGN3        | GCTATCCACTGCTGCTTGA     | CCGGGAAAAGGTTGTTGTGT      |
| OCT4        | GAGCACGAGTGGAAGCAAC     | TTCTGCAGGGCTTTCATGTC      |
| SOHLH1      | ATGCTTTGGGATGCTGGATA    | GACCCACCA GGAACAA TGTC    |
| SOHLH2      | AGAGACAGATGCCCATCGAG    | CTCTCACTGCTCCCTCCAAA      |
| SOX9        | AGTACCCGCA TCTGCACAAC   | AATCGGGGTGGTCTTTCTTG      |
| SRF-1       | TCCATTCAGCACCTTCAACA    | TCATCCAAATGGAAGAGCC       |
| SYCP1       | TGTTGATCCAAAGTCTGAGA    | TTCAAGTTCTGATGTTAAATGATCC |
| SYCP2       | TGCAGATACCATCAGATGAAAAA | GACAGCTTCCCATGTTGAT       |
| SYCP3       | GTGTTGCAGCAGTGGGAAC     | GCTCGTGATCTGTTTGATTGC     |
| XMR         | GATAATCGGCTCTGTCCAGG    | GGCGGCATATTCTCATGTTT      |
